# Supplementary material
Source: MDPI journal article supplement (https://www.mdpi.com/2075-163X/14/3/323)
Supplement: s1 [file s1]

# **Flow Field Characteristics and Flotation Efficacy in a Pulse Jet Flotation Machine: A Comprehensive Investigation**

Xuqin Duan <sup>a,b\*</sup>, Chen He <sup>a</sup>, Dandan Shen <sup>a</sup>, Meng Song <sup>a</sup>, Chunbao Sun <sup>a,b</sup>

a. School of Civil and Resource Engineering, University of Science & Technology Beijing,  
Beijing 100083, P. R. China;

b. State Key Laboratory for Efficient Mining of Metal Mines, University of Science &  
Technology Beijing, Beijing 100083, P. R. China

**\*. Corresponding author**

**Email: dxq918@ustb.edu.cn. (Xuqin Duan)**

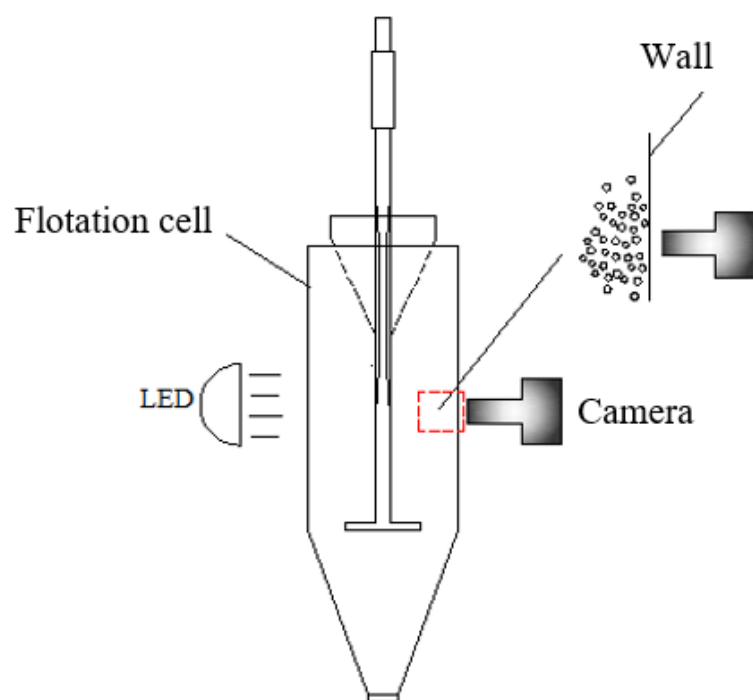

**Figure S1.** Schematic diagram of bubble image acquisition.

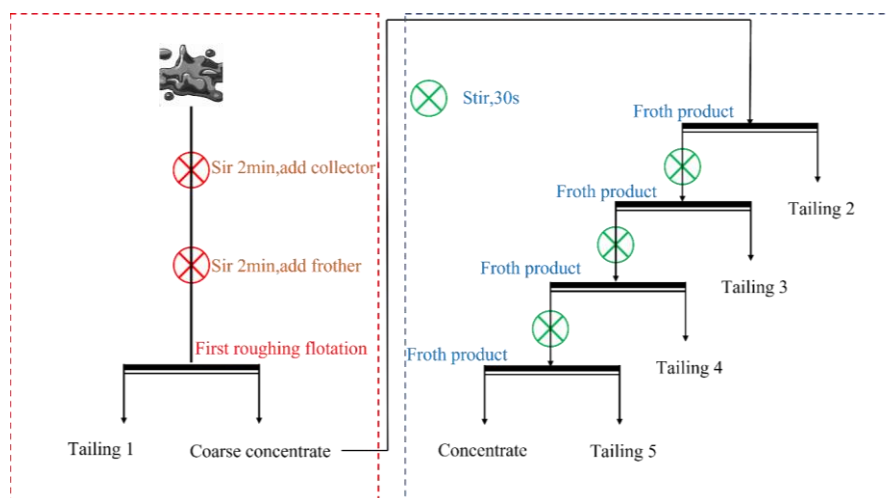

**Figure S2.** Flowsheet of the stepwise release flotation.
